# Supplementary material for: Refining wet lab experiments with in silico searches: A rational quest for diagnostic peptides in visceral leishmaniasis
Source: PubMed Central journal article supplement (PMC6522066; doi:10.1371/journal.pntd.0007353), 2019-05-06
Supplement: pntd.0007353.s003.pdf [file pntd.0007353.s003.pdf]

**S2 Table.** The top 20 scoring peptides from each of the four prediction algorithms were shortlisted and synthesised for antigenicity screening with Sudanese visceral leishmaniasis (VL) serum samples. 'C.reported' was calculated by dividing the reported amount by the volume of the solvent mixture in which the peptides were dissolved, while 'C.280' and 'C.205' were calculated based on the molar absorbances at 280 and 205 nm, respectively. All concentrations are given in mg/ml. MW is given in g/mol. Peptides that could not be dissolved and were therefore not included in the pilot peptide screening are marked with an asterisk.

| ID            | Sequence          | Peptide length | MW      | Purity | C.reported | C.280 | C.205 |
|---------------|-------------------|----------------|---------|--------|------------|-------|-------|
| abc_01_CVTQ   | CVTQEHFREAMAKTNP  | 16             | 2287.63 | 0.58   | 2          | NA    | 3.27  |
| abc_02_KEAP   | KEAPGATEKDRAKATP  | 16             | 2095.38 | 0.57   | 2          | NA    | 3.14  |
| abc_03_TAYI   | TAYIMRPLDHGADVTL  | 16             | 2198.57 | 0.69   | 2          | 2.75  | NA    |
| abc_04_MITN   | MITNDDAPVRDSVLTD  | 16             | 2187.45 | 0.45   | 1.23       | NA    | NA    |
| abc_05_MPTV*  | MPTVDERQTFMFSATF  | 16             | 2333.71 | 0.4    | 2.31       | NA    | NA    |
| abc_06_TRTG*  | TRTGDYAFSYDKMLDM  | 16             | 2339.67 | 0.55   | 1.13       | NA    | NA    |
| abc_07_KSTI   | KSTISGHLLMEKGLVD  | 16             | 2153.57 | 0.53   | 2          | NA    | 2.65  |
| abc_08_KEAI   | KEAITTFREEDPKVTD  | 16             | 2304.58 | 0.48   | 2          | NA    | NA    |
| abc_09_HVYS   | HVYSELGKKFGAAADP  | 16             | 2115.41 | 0.51   | 2          | 3.42  | 4.23  |
| abc_10_LGMG   | LGMISGGEEGARKGP   | 16             | 1941.23 | 0.56   | 2          | NA    | 2.52  |
| abc_11_VAYQ   | VAYQETPESERAELPP  | 16             | 2241.48 | 0.52   | 2          | 2.22  | 2.13  |
| abc_12_AGTG   | AGTGFPYREMMPMNAP  | 16             | 2195.61 | 0.72   | 2          | 3.95  | NA    |
| abc_13_TD SW* | TDSWGFFGVFDGHVND  | 16             | 2225.4  | 0.57   | 1.33       | NA    | NA    |
| abc_14_HKKS   | HKKSTEDNDDDAFCAP  | 16             | 2218.37 | 0.54   | 1          | NA    | NA    |
| abc_15_YGLA   | YGLAFDPYGGTAGLYD  | 16             | 2105.33 | 0.54   | 1.33       | 0.74  | 0.76  |
| abc_16_WEEW   | WEEWGNPNEYKYDYDM  | 16             | 2612.86 | 0.49   | 1.73       | 1.68  | 1.43  |
| abc_17_HSTI   | HSTIGVHPTSAEELCS  | 16             | 2093.33 | 0.65   | 2          | NA    | 2.68  |
| abc_18_EKCI   | EKCIELKPDFVKGYAR  | 16             | 2321.76 | 0.53   | 0.87       | 3.85  | 1.08  |
| abc_19_PAGI   | PAGINIPNYDDIRQTV  | 16             | 2211.5  | 0.57   | 0.77       | 1.69  | 0     |
| abc_20_TGTI   | TGTIDNGVVKMEKAEAE | 16             | 2146.44 | 0.55   | 2          | NA    | NA    |
| BP_01_CSPP    | CSPPPPSPSPHPPPS   | 16             | 2062.38 | 0.7    | 2          | NA    | 1.98  |
| BP_02_GEGS    | GEGSPTSPTSPPKQPGS | 16             | 1939.11 | 0.65   | 2          | NA    | 2.08  |
| BP_03_AEAG    | AEAGAPAGSGAPPPAD  | 16             | 1760.92 | 0.56   | 2          | NA    | NA    |

S2 Table continued from previous page

| ID          | Sequence          | Peptide length | MW      | Purity | C.reported | C.280 | C.205 |
|-------------|-------------------|----------------|---------|--------|------------|-------|-------|
| BP_04_KPAP  | KPAPPKPKESKEPENA  | 16             | 2172.55 | 0.59   | 2          | NA    | 1.88  |
| BP_05_TAKP  | TAKPKQDEDDPDGAAE  | 16             | 2125.28 | 0.63   | 2          | NA    | NA    |
| BP_06_GGDR  | GGDRGGGTGNEDDDYE  | 16             | 2039.02 | 0.79   | 2          | 2.95  | 2.05  |
| BP_07_MQQP  | MQQPPTQPQKQKQKQ   | 16             | 2345.71 | 0.53   | 2          | NA    | 3.13  |
| BP_08_EEEE* | EEEEEEEEEEEPQATR  | 16             | 2417.44 | 0.61   | 1.62       | NA    | NA    |
| BP_09_RSDP  | RSDPSGGGGNRDDNE   | 16             | 2015.04 | 0.6    | 2          | NA    | NA    |
| BP_10_APAS  | APASAPAPAPAAATP   | 16             | 1783.06 | 0.67   | 2          | NA    | 2.61  |
| BP_11_KRGG  | KRGGDKDGGESGEAA   | 16             | 1916.04 | 0.62   | 2          | NA    | NA    |
| BP_12_RSQQ  | RSQQGEQEPEDEEEV   | 16             | 2343.41 | 0.63   | 2          | NA    | NA    |
| BP_13_QQLS  | QQLSSPPPRERAED    | 16             | 2219.45 | 0.57   | 2          | NA    | NA    |
| BP_14_EPEV  | EPEVGEPEQPPEEEEDA | 16             | 2238.31 | 0.72   | 2          | NA    | NA    |
| BP_15_AAPS  | AAPSGGPGNSDEEDL   | 16             | 1928    | 0.68   | 2          | NA    | NA    |
| BP_16_SDVT  | SDVTGGGGGGSGGGG   | 16             | 1560.6  | 0.64   | 1          | NA    | NA    |
| BP_17_GQQQ  | GQQQQQDPPAGQQGV   | 16             | 2119.28 | 0.82   | 2          | NA    | NA    |
| BP_18_AETP  | AETPADDAGQPHEPEK  | 16             | 2117.26 | 0.71   | 2          | NA    | NA    |
| BP_19_PPSA  | PPSAGSKDGAPSDGVP  | 16             | 1864.05 | 0.51   | 2          | NA    | NA    |
| BP_20_DATP  | DATPAAANGEGPGKEN  | 16             | 1924.06 | 0.65   | 2          | NA    | NA    |
| EpQ_01_AYAT | AYATMLKDVQWKVRKS  | 16             | 2349.82 | 0.58   | 2          | 6.79  | 6.25  |
| EpQ_02_HEKL | HEKLVQDIWKKLEAKG  | 16             | 2347.79 | 0.58   | 2          | 4.28  | 4.01  |
| EpQ_03_SCSV | SCSVKGLWKNVAVNCC  | 16             | 2161.55 | 0.57   | 2          | 6.56  | 6.9   |
| EpQ_04_MAYV | MAYVCELGPNQQGWK   | 14             | 2021.38 | 0.58   | 0.88       | 6.49  | NA    |
| EpQ_05_LKDP | LKDPKQYQSIVDAEWK  | 16             | 2373.73 | 0.31   | 2          | 1.88  | NA    |
| EpQ_06_ERCE | ERCEDPNAWKGPTNGG  | 16             | 2156.35 | 0.62   | 1.33       | 1.92  | NA    |
| EpQ_07_DNPA | DNPAGPTTWKSDEPAL  | 16             | 2124.33 | 0.62   | 1.73       | 1.8   | 1.88  |
| EpQ_08_YGIS | YGISFPKNPMLTEWKT  | 16             | 2337.77 | 0.43   | 2          | 2.69  | 2.79  |
| EpQ_09_GMSS | GMSSDQLLQFLQKQQQ  | 16             | 2289.63 | 0.48   | 1.86       | NA    | NA    |
| EpQ_10_AAKK | AAKKKRVGCWK       | 11             | 1700.11 | 0.56   | 2          | 2.29  | 2.22  |

S2 Table continued from previous page

| ID           | Sequence          | Peptide length | MW      | Purity | C.reported | C.280 | C.205 |
|--------------|-------------------|----------------|---------|--------|------------|-------|-------|
| EpQ_11_NIRI  | NIRIHLGDTIRIAPCK  | 16             | 2245.71 | 0.51   | 1.1        | NA    | 2.33  |
| EpQ_12_ERRR  | ERRRVEYQQFLDVCGQ  | 16             | 2451.78 | 0.41   | 1.4        | 6.14  | NA    |
| EpQ_13_MDRE  | MDRESLCPNWK       | 11             | 1804.11 | 0.41   | 2          | 2.06  | NA    |
| EpQ_14_SRQM  | SRQMTMCKEERIANCK  | 16             | 2353.81 | 0.34   | 2          | NA    | 1.85  |
| EpQ_15_DWSI  | DWSIVERGWK        | 10             | 1700.95 | 0.5    | 2.13       | 1.69  | NA    |
| EpQ_16_VLVQ* | VLVQGAIWGINSYDQW  | 16             | 2274.6  | 0.39   | 15         | NA    | NA    |
| EpQ_17_GRTI  | GRTILRNHKWAGNNKV  | 16             | 2289.67 | 0.31   | 2          | 2.1   | 1.79  |
| EpQ_18_EKVR  | EKVRSGEWKQGTGKSI  | 16             | 2215.53 | 0.38   | 2          | 2.13  | 2.11  |
| EpQ_19_PDVA  | PDVAHVVFQFDLPQEMD | 16             | 2265.57 | 0.52   | 2.31       | NA    | NA    |
| EpQ_20_ADVT  | ADVTATLAWK        | 10             | 1500.75 | 0.49   | 1.03       | 1.56  | NA    |
| LbT_01_RPGG  | RPGGPPGYRTPYTAK   | 15             | 2043.35 | 0.45   | 2          | 9.28  | 2.46  |
| LbT_02_TQGD  | TQGDRQKIQDAVSA    | 15             | 2013.23 | 0.52   | 1.3        | NA    | NA    |
| LbT_03_EVKS  | EVKSRYNVDV'SQNK   | 15             | 2247.54 | 0.53   | 2          | 2.69  | 2.1   |
| LbT_04_VIEM  | VIEMTRAFEDDDDFDK  | 15             | 2256.51 | 0.51   | 2          | NA    | NA    |
| LbT_05_GSAD  | GSADLTPSNLTRPAS   | 15             | 1912.12 | 0.47   | 2          | NA    | NA    |
| LbT_06_VRPI  | VRPIPSFDDMPLHQ    | 15             | 2191.53 | 0.47   | 2          | NA    | NA    |
| LbT_07_CELG  | CELGNQGWKAVVAD    | 15             | 2012.3  | 0.47   | 1.07       | 1.59  | NA    |
| LbT_08_APQQ  | APQQTQSGIRRVTRA   | 15             | 2094.4  | 0.44   | 2          | NA    | 2.18  |
| LbT_09_SAEF  | SAEEKGTGKRNQITI   | 15             | 2057.33 | 0.42   | 2          | NA    | 0.7   |
| LbT_10_GEAE  | GEAEWLEWESTVLTP   | 15             | 2172.42 | 0.54   | 0.96       | 1.08  | 0     |
| LbT_11_EELR  | EELQRHRHQGPGSPG   | 15             | 2129.36 | 0.41   | 0.87       | NA    | 0.66  |
| LbT_12_EWAN  | EWANKPLDDLDPHPS   | 15             | 2159.38 | 0.55   | 2          | 1.57  | 1.56  |
| LbT_13_IKEE* | IKEETEMIEGEVVEV   | 15             | 2159.48 | 0.5    | 1.62       | NA    | NA    |
| LbT_14_VSDF  | VSDFFGGKELNKSIN   | 15             | 2080.36 | 0.74   | 2.92       | NA    | 2.12  |
| LbT_15_WEDV  | WEDVGGLLDVKRELQ   | 15             | 2182.5  | 0.53   | 2          | 1.67  | 0     |
| LbT_16_SGGA  | SGGAGPAGGASSGPK   | 15             | 1582.72 | 0.53   | 2          | NA    | 2.5   |
| LbT_17_KATN  | KATNGDTHLGGEDFD   | 15             | 2002.12 | 0.57   | 2          | NA    | NA    |

S2 Table continued from previous page

| ID          | Sequence        | Peptide length | MW      | Purity | C.reported | C.280 | C.205 |
|-------------|-----------------|----------------|---------|--------|------------|-------|-------|
| LbT_18_EREG | EREGKDITLIGFSRG | 15             | 2103.4  | 0.53   | 1.56       | NA    | 2     |
| LbT_19_AWAS | AWASSPAPTEARTAP | 15             | 1938.17 | 0.45   | 2          | 4.01  | NA    |
| LbT_20_VDRD | VDRDNKKLSSGMVCS | 15             | 2064.4  | 0.51   | 2          | NA    | 2.53  |
